# Supplementary material for: Selecting Optimal Proton Pencil Beam Scanning Plan Parameters to Reduce Dose Discrepancy between Discrete Spot Plan and Continuous Scanning: A Proof-of-Concept Study
Source: MDPI journal article supplement (doi:10.3390/cancers15164084), 2023-08-13
Supplement: s1 [file s1]

Supplementary Materials

# Selecting Optimal Proton Pencil Beam Scanning Plan Parameters to Reduce Dose Discrepancy between Discrete Spot Plan and Continuous Scanning: A Proof-of-Concept Study

Xiaoying Liang, Chris J. Beltran, Chunbo Liu, Chunjoo Park, Bo Lu, Sridhar Yaddanapudi, Jun Tan and Keith M. Furutani

**Table S1.** Simulated DDCS Dose Discrepancy and Fraction of Break Spots.

| MU/spot minimum, mMU | Spot spacing, sigma | Dose, GyRBE | Stop ratio constraint | Break spots fraction, % | CTV DVH RMSE, % | 2%/2-mm gamma passing rate, % | 1%/1-mm gamma passing rate, % |
|----------------------|---------------------|-------------|-----------------------|-------------------------|-----------------|-------------------------------|-------------------------------|
| 0.1                  | 0.5                 | 0.5         | 1                     | 90                      | 0.0             | 100.0                         | 100.0                         |
| 0.1                  | 1.0                 | 0.5         | 1                     | 78                      | 0.3             | 98.0                          | 91.1                          |
| 0.1                  | 1.5                 | 0.5         | 1                     | 71                      | 0.2             | 98.5                          | 90.9                          |
| 3.0                  | 0.5                 | 0.5         | 1                     | 49                      | 0.6             | 98.2                          | 89.9                          |
| 3.0                  | 1.0                 | 0.5         | 1                     | 39                      | 1.0             | 98.4                          | 87.8                          |
| 3.0                  | 1.5                 | 0.5         | 1                     | 49                      | 0.3             | 99.6                          | 96.7                          |
| 6.0                  | 1.0                 | 0.5         | 1                     | 25                      | 1.9             | 93.3                          | 78.8                          |
| 0.1                  | 0.5                 | 2.0         | 1                     | 63                      | 0.0             | 100.0                         | 100.0                         |
| 0.1                  | 1.0                 | 2.0         | 1                     | 43                      | 0.1             | 100.0                         | 99.4                          |
| 0.1                  | 1.5                 | 2.0         | 1                     | 25                      | 0.1             | 100.0                         | 100.0                         |
| 3.0                  | 0.5                 | 2.0         | 1                     | 29                      | 0.1             | 100.0                         | 100.0                         |
| 3.0                  | 1.0                 | 2.0         | 1                     | 23                      | 0.1             | 100.0                         | 100.0                         |
| 3.0                  | 1.5                 | 2.0         | 1                     | 14                      | 0.0             | 100.0                         | 100.0                         |
| 6.0                  | 0.5                 | 2.0         | 1                     | 11                      | 0.9             | 99.4                          | 91.3                          |
| 6.0                  | 1.0                 | 2.0         | 1                     | 8                       | 0.4             | 100.0                         | 97.7                          |
| 6.0                  | 1.5                 | 2.0         | 1                     | 6                       | 0.1             | 100.0                         | 99.9                          |
| 0.1                  | 0.5                 | 0.5         | 0                     | 75                      | 0.0             | 100.0                         | 100.0                         |
| 0.1                  | 1.0                 | 0.5         | 0                     | 58                      | 0.6             | 98.0                          | 91.1                          |
| 0.1                  | 1.5                 | 0.5         | 0                     | 40                      | 0.3             | 98.5                          | 90.9                          |
| 3.0                  | 0.5                 | 0.5         | 0                     | 22                      | 2.5             | 86.5                          | 74.2                          |
| 3.0                  | 1.0                 | 0.5         | 0                     | 16                      | 1.6             | 95.2                          | 82.9                          |
| 3.0                  | 1.5                 | 0.5         | 0                     | 21                      | 1.0             | 96.3                          | 84.9                          |
| 6.0                  | 1.0                 | 0.5         | 0                     | 7                       | 4.5             | 81.4                          | 63.5                          |
| 0.1                  | 0.5                 | 2.0         | 0                     | 39                      | 0.0             | 100.0                         | 100.0                         |
| 0.1                  | 1.0                 | 2.0         | 0                     | 29                      | 0.1             | 100.0                         | 99.7                          |
| 0.1                  | 1.5                 | 2.0         | 0                     | 19                      | 0.1             | 100.0                         | 99.8                          |
| 3.0                  | 0.5                 | 2.0         | 0                     | 9                       | 0.2             | 100.0                         | 99.9                          |
| 3.0                  | 1.0                 | 2.0         | 0                     | 8                       | 0.2             | 100.0                         | 99.8                          |
| 3.0                  | 1.5                 | 2.0         | 0                     | 5                       | 0.1             | 100.0                         | 100.0                         |
| 6.0                  | 0.5                 | 2.0         | 0                     | 3                       | 3.7             | 79.3                          | 65.4                          |
| 6.0                  | 1.0                 | 2.0         | 0                     | 3                       | 1.1             | 97.0                          | 87.9                          |
| 6.0                  | 1.5                 | 2.0         | 0                     | 0                       | 0.2             | 100.0                         | 99.4                          |
| 3.0                  | 0.5                 | 5.0         | 0                     | 2                       | 0.1             | 100.0                         | 100.0                         |

|     |     |      |   |   |     |       |       |
|-----|-----|------|---|---|-----|-------|-------|
| 3.0 | 1.0 | 5.0  | 0 | 2 | 0.1 | 100.0 | 100.0 |
| 3.0 | 1.5 | 5.0  | 0 | 2 | 0.0 | 100.0 | 100.0 |
| 6.0 | 0.5 | 5.0  | 0 | 1 | 0.2 | 97.9  | 80.6  |
| 6.0 | 1.0 | 5.0  | 0 | 0 | 0.1 | 100.0 | 100.0 |
| 6.0 | 1.5 | 5.0  | 0 | 1 | 0.0 | 100.0 | 100.0 |
| 3.0 | 0.5 | 10.0 | 0 | 0 | 0.1 | 100.0 | 100.0 |
| 3.0 | 1.0 | 10.0 | 0 | 1 | 0.1 | 100.0 | 100.0 |
| 3.0 | 1.5 | 10.0 | 0 | 2 | 0.0 | 100.0 | 100.0 |
| 6.0 | 0.5 | 10.0 | 0 | 0 | 0.2 | 100.0 | 100.0 |
| 6.0 | 1.0 | 10.0 | 0 | 0 | 0.1 | 100.0 | 100.0 |
| 6.0 | 1.5 | 10.0 | 0 | 0 | 0.0 | 100.0 | 100.0 |

Abbreviations: CTV, clinical target volume; DDCS, dose-driven continuous scanning; DVH, dose-volume histogram; GyRBE, relative biological effectiveness of physical dose in Gray; MU, monitor unit; RMSE, root mean square error.
